# Supplementary material for: Impact of seasonal blood pressure changes on visit-to-visit blood pressure variability and related cardiovascular outcomes
Source: PubMed Central journal article supplement (PMC11198955; doi:10.1097/hjh.0000000000003759), 2024-05-01
Supplement: jhype-42-1269-s001.pdf [file jhype-42-1269-s001.pdf]

# SUPPLEMENTARY MATERIAL

IMPACT OF SEASONAL BLOOD PRESSURE CHANGES  
ON VISIT-TO-VISIT BLOOD PRESSURE VARIABILITY AND RELATED  
OUTCOMES

Giuseppe Mancia, MD1; Helmut Schumacher, PhD2; Michael Böhm, MD3;  
Guido Grassi, MD1; Teo K Koon, PhD4; Felix Mahfoud, MD3;  
Gianfranco Parati, MD1; Josep Redon, MD5 and Salim Yusuf, DPhil4.

**Supplementary Table 1. Number of patients in participating countries**

|                         |              |
|-------------------------|--------------|
| <b>Total</b>            | <b>25390</b> |
| Northern Hemisphere     | 20638        |
| Europe                  | 11590        |
| Austria                 | 125          |
| Belgium                 | 752          |
| Czechia                 | 548          |
| Denmark                 | 406          |
| Finland                 | 325          |
| France                  | 701          |
| Germany                 | 1445         |
| Greece                  | 191          |
| Hungary                 | 544          |
| Ireland                 | 149          |
| Italy                   | 903          |
| Netherlands             | 957          |
| Norway                  | 213          |
| Poland                  | 710          |
| Portugal                | 171          |
| Russia                  | 518          |
| Slovakia                | 356          |
| Spain                   | 485          |
| Sweden                  | 473          |
| Switzerland             | 192          |
| UK                      | 791          |
| Ukraine                 | 635          |
| North America           | 4719         |
| Canada                  | 2360         |
| USA                     | 2359         |
| Latin-America           | 382          |
| Mexico                  | 382          |
| Asia / Middle East      | 3947         |
| China                   | 1460         |
| Hong Kong               | 355          |
| Malaysia                | 237          |
| Philippines             | 279          |
| Singapore               | 68           |
| South Korea             | 364          |
| Taiwan                  | 425          |
| Thailand                | 366          |
| Turkey                  | 191          |
| UAE                     | 202          |
| Southern Hemisphere     | 4752         |
| Australia / New Zealand | 1747         |
| Australia               | 1105         |
| New Zealand             | 642          |
| South-America           | 2351         |
| Argentina               | 1389         |
| Brazil                  | 962          |
| Africa                  | 654          |
| South Africa            | 654          |

**Supplementary Table 2.** Mean contribution to each SBP-CV quintile by SBP seasonality and P values of between-quintile different contributions.

| <b>Quintile</b> | <b>Mean change (95% CI)<br/>Conventional – Residual SBP-CV</b> | <b>p-value<br/>vs 1<sup>st</sup> quintile</b> | <b>p-value<br/>vs 2<sup>nd</sup> quintile</b> | <b>p-value<br/>vs 3<sup>rd</sup> quintile</b> | <b>p-value<br/>vs 4<sup>th</sup> quintile</b> |
|-----------------|----------------------------------------------------------------|-----------------------------------------------|-----------------------------------------------|-----------------------------------------------|-----------------------------------------------|
| 1               | 0.055 (0.041, 0.069)                                           |                                               |                                               |                                               |                                               |
| 2               | -0.036 (-0.050, -0.021)                                        | < 0.0001                                      |                                               |                                               |                                               |
| 3               | -0.085 (-0.099, -0.077)                                        | < 0.0001                                      | < 0.0001                                      |                                               |                                               |
| 4               | -0.099 (-0.114, -0.086)                                        | < 0.0001                                      | < 0.0001                                      | 0.67                                          |                                               |
| 5               | -0.124 (-0.138, -0.110)                                        | < 0.0001                                      | < 0.0001                                      | 0.0012                                        | 0.099                                         |

Data from patients of Table 1. Abbreviations as in preceding Figures and Table 1.
